# Supplementary material for: Defining a Water-Soluble Formulation of Arachidonic Acid as a Novel Ferroptosis Inducer in Cancer Cells
Source: MDPI journal article supplement (doi:10.3390/biom14050555), 2024-05-04
Supplement: s1 [file s1]

**A**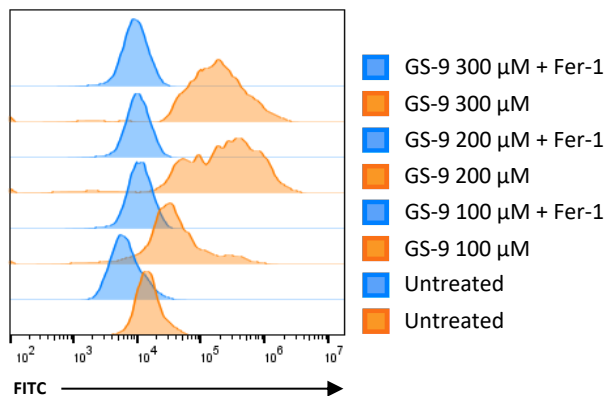**B**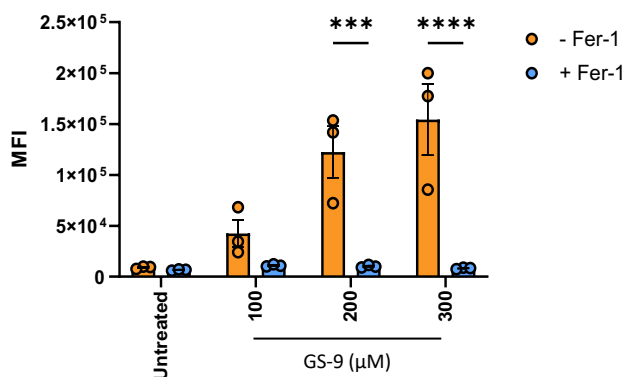

**Supplementary Figure S1. GS-9 induces lipid peroxidation in Jurkat Cells.** (A) Jurkat cells were stained with C11-BODIPY and treated with increasing concentrations of GS-9 for 24 h. Oxidised BODIPY C11 (FITC) levels were plotted as histograms after flow cytometry analysis. C11-BODIPY MFI was quantified in (B) ( $n=3 \pm \text{S.E.M.}$ , 2way Anova, Šídák's Multiple Comparisons, \*\*\*  $p = 0.0006$ , \*\*\*\*  $p < 0.0001$ ).

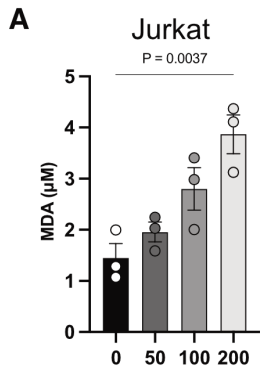

**Supplementary Figure S2. GS-9 induces MDA Accumulation in Jurkat Cells. (A)** Jurkat cells were treated with increasing concentrations of GS-9 for 24 h before MDA levels were analysed (n = 3,  $\pm$  S.E.M., one-way ANOVA, Tukey's multiple comparison test).

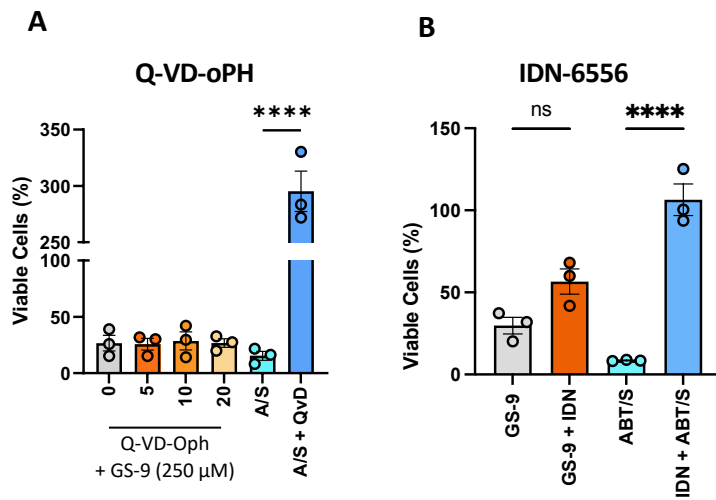

**Supplementary Figure S3. Pan-caspase inhibitors do not protect from GS-9 killing in Jurkat cells.**

Jurkat cells were treated with increasing concentrations of **(A)** Q-VD-oPH or **(B)** IDN-6556 at 5 μM in the presence of 250 μM GS-9 as well as a BH3 mimetic apoptosis positive control before undergoing MTS assays to determine viability as a percentage of vehicle controls (Q-VD-oPH: n = 3, mean ± S.E.M., One-way Anova, Tukey's Multiple Comparison,  $p > 0.0001$ ) (IDN-6556: n = 3, mean ± S.E.M., One-way Anova, Tukey's Multiple Comparison,  $p > 0.0001$ ).

**A**

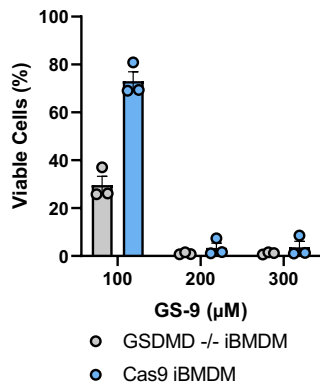

**Supplementary Figure S4. GS-9 does not induce Pyroptosis. (A)** iBMDM Cas9 and GSDMD<sup>-/-</sup> cells were treated with increasing concentrations of GS-9 before undergoing an MTT assay to determine viability (n = 3, ±S.E.M).

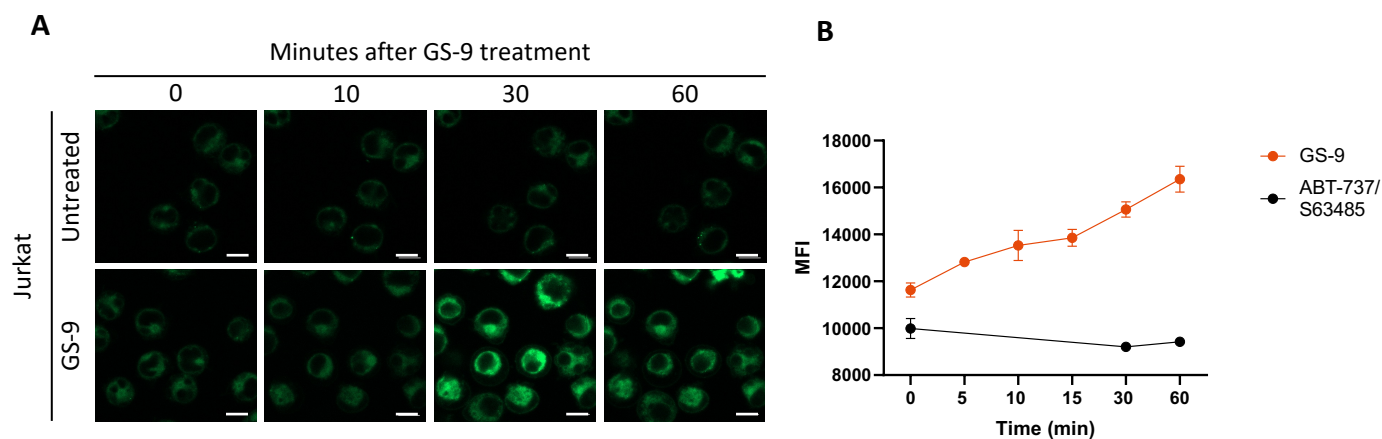

**Supplementary Figure S5. GS-9 localises intracellularly at lipid droplets in Jurkat cells.** **(A)** Confocal time course microscopy analysis of Jurkat cells stained with BODIPY and treated with GS-9 (scale bar = 10  $\mu$ m; images representative of 3 experiments). **(B)** Jurkat cells were stained with BODIPY and treated with GS-9 prior to analysis by flow cytometry to determine lipid droplet levels as indicated by BODIPY MFI ( $n = 3$ ,  $\pm$ S.E.M.).

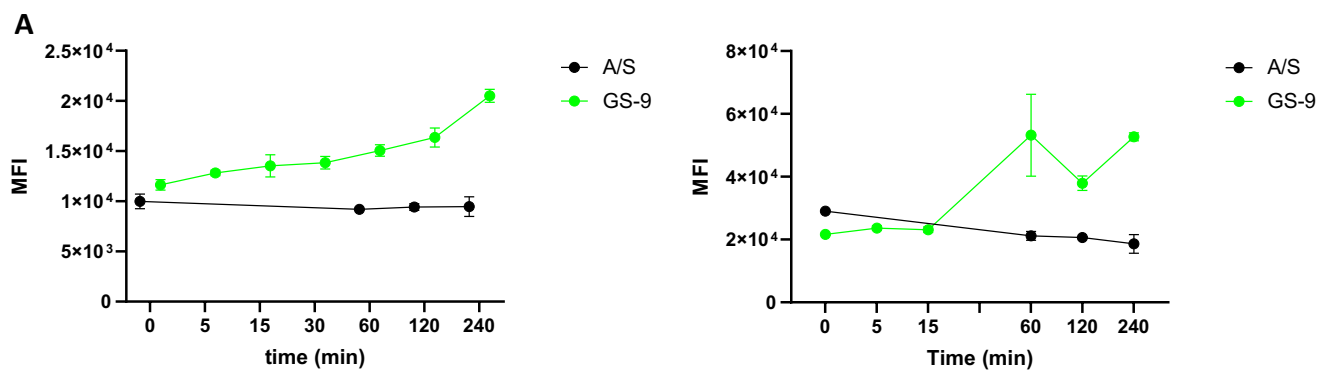

**Supplementary Figure S6. GS-9 Uptake Replicates. (A)** Additional replicates showing GS-9 uptake, A549 cells were stained with BODIPY and treated with GS-9 prior to analysis by flow cytometry to determine lipid droplet levels as indicated by BODIPY MFI ( $n = 3$ ,  $\pm$ S.E.M).

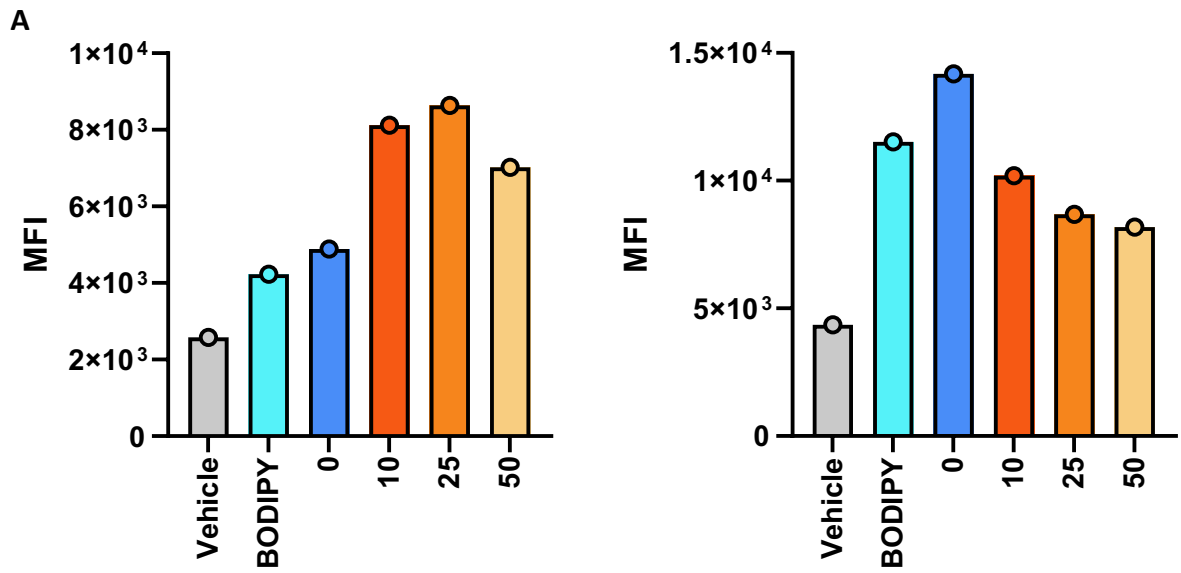

**Supplementary Figure S7. Effect of Grassofermata on GS-9 Uptake (A)** A549 cells were stained with BODIPY and treated with GS-9 and increasing concentrations of Grassofermata (GF) for 4 h. BODIPY levels were quantified as MFI ( $n = 3$ ,  $\pm$ S.E.M).
