# Supplementary figures and images for: Defining a Water-Soluble Formulation of Arachidonic Acid as a Novel Ferroptosis Inducer in Cancer Cells
Source: MDPI journal article supplement (doi:10.3390/biom14050555), 2024-05-04

Figure 4 A Original Western Blots

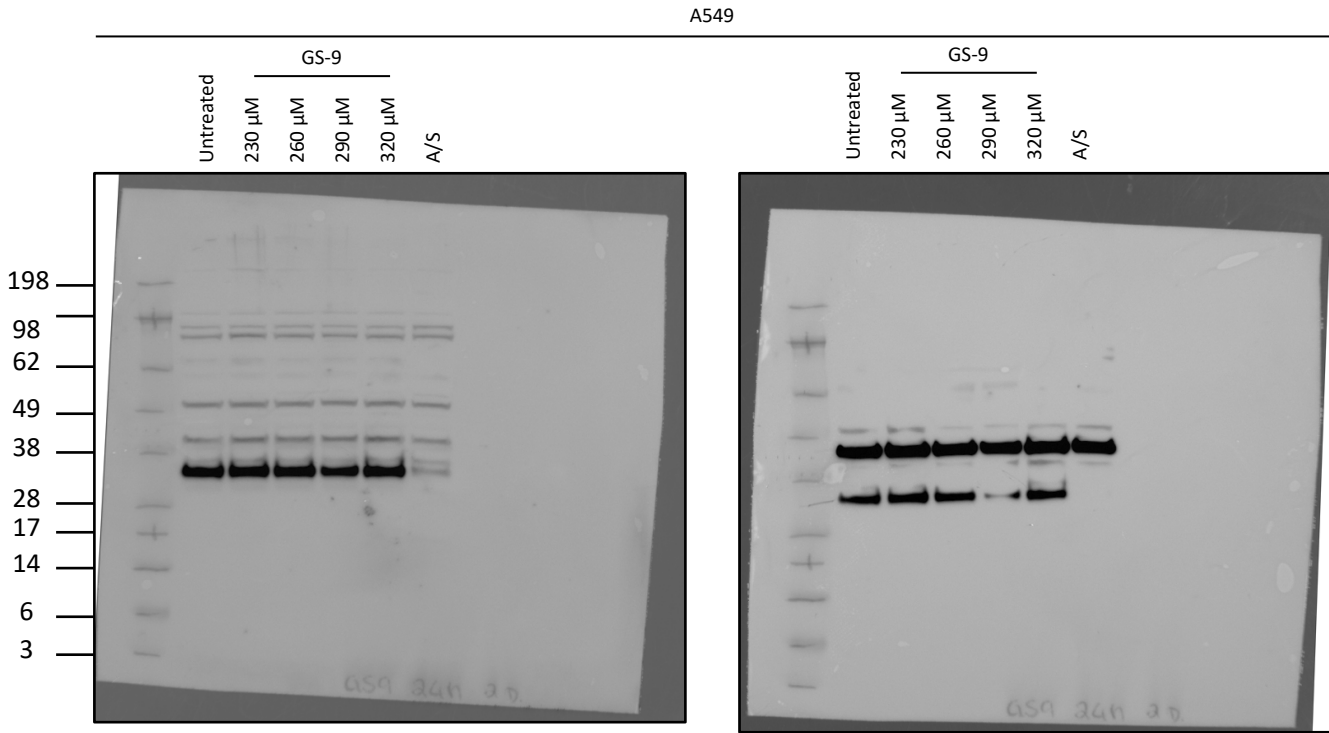

Figure 5 B Original Western Blots

HT-29 (6h)

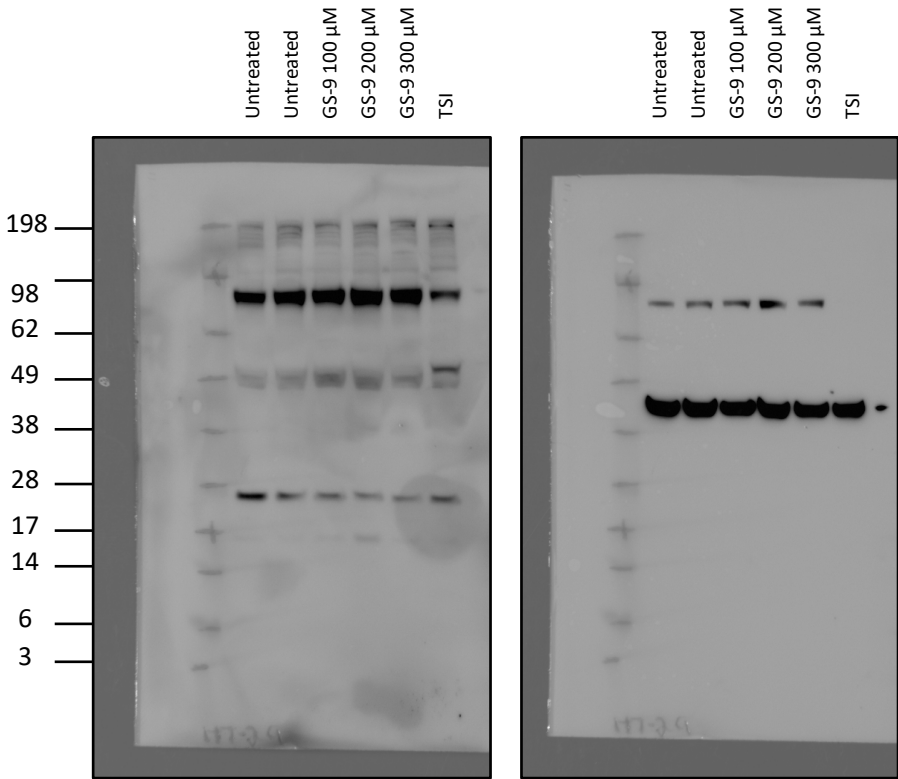

Supplement: s1 [file s1]
